# Supplementary material for: Characterization of the aromatic profile in “zijuan” and “pu-erh” green teas by headspace solid-phase microextraction coupled with GC-O and GC-MS
Source: Royal Society of Chemistry journal article supplement (doi:10.1039/c6ay00700g), 2016-01-01
Supplement: c6ay00700g1.xlsx [file c6ay00700g1.xlsx]

## Sheet: Zijuan green tea
Compounds	Description	RI	Range	Zijuan1	Zijuan2	Zijuan3	Zijuan4	Zijuan5	Sum	Average	Rounded data
Hexanal	Green	800	3--6	3	6	4	5	4	22	4.4	4
(Z)-3-Hexen-1-ol	Green	856	0--4	2	2	4	0	0	8	1.6	2
Benzaldehyde	Almond	963	2--5	2	4	3	2	5	16	3.2	3
1-Octen-3-ol	Mushroom	974	3--6	5	4	3	3	6	21	4.2	4
6-Methyl-5-hepten-2-one	Fruity, orange	981	2--4	4	2	2	4	3	15	3	3
β-Pinene	Woody	986	2--4	4	3	4	4	2	17	3.4	4
2-Pentyl-furan	Fruity	991	0--5	0	3	2	0	5	10	2	2
α-Phellandrene	Fruity	1002	0--3	2	0	0	3	3	8	1.6	2
α-Terpinene	Fruity	1019	0--4	4	2	4	0	2	12	2.4	2
D-Limonene	Fruity, lemon-like	1030	3--6	6	3	5	5	4	23	4.6	5
Benzyl alcohol	Fruity	1039	5--7	7	5	6	5	7	30	6	6
Benzeneacetaldehyde	Fruity	1046	2--5	3	3	4	2	5	17	3.4	3
α-Ocimene	Green	1051	0--3	0	3	0	3	0	6	1.2	1
Acetophenone	Fruity	1062	0--2	2	0	2	0	0	4	0.8	1
(E)-2-Octen-1-ol	Fatty	1068	2--5	4	2	2	5	4	17	3.4	3
Linalool oxide I	Floral	1071	5--7	7	6	7	7	5	32	6.4	6
Linalool oxide II	Floral	1084	6--9	9	7	9	6	8	39	7.8	8
β-Linalool	Floral	1098	10--10	10	10	10	10	10	50	10	10
Hotrienol	Musty	1109	5--8	6	8	6	7	6	33	6.6	7
Phenylethyl alcohol	Floral	1115	2--5	5	2	3	2	2	14	2.8	3
Linalool oxide III	Floral	1170	3--6	3	6	4	4	3	20	4	4
Linalool oxide IV	Floral	1174	2--6	6	2	5	3	2	18	3.6	4
4-Terpineol	Fruity, sweet	1179	0--4	4	2	0	0	2	8	1.6	2
Naphthalene	Woody, camphor-like	1183	0--5	5	3	0	2	5	15	3	3
2-(4-Methylphenyl)-2-propanol	Fruity, sweet	1189	0--3	0	0	3	3	0	6	1.2	1
α-Terpineol	Floral, sweet	1193	4--8	5	8	5	4	6	28	5.6	6
Methyl salicylate	Green, wintergreen-like	1198	3--6	5	4	6	3	4	22	4.4	4
Safranal	Woody	1202	2--4	4	2	3	4	2	15	3	3
Decanal	Floral, sweet	1207	0--3	0	2	0	2	3	7	1.4	1
β-Cyclocitral	Fruity	1217	3--5	4	3	3	5	3	18	3.6	4
Nerol	Floral, rose	1225	4--6	6	5	4	6	4	25	5	5
cis-3-Hexenyl isovalerate	Fruity, apple-like	1239	0-4	0	4	3	0	2	9	1.8	2
Carvone	Mint	1245	2--6	4	6	2	2	4	18	3.6	4
Geraniol	Floral, rose	1260	10--10	10	10	10	10	10	50	10	10
Nonanoic acid	Fatty, Unpleasant flavor	1289	2--5	5	2	3	5	3	18	3.6	4
2-Methyl-naphthalene	Herbal-like	1303	0--3	2	0	0	3	3	8	1.6	2
Indole	Unpleasant flavor	1309	3--5	5	4	3	3	5	20	4	4
1-Methyl-naphthalene	Unpleasant flavor	1312	3--6	6	5	3	3	5	22	4.4	4
Geranic acid	Floral, sweet	1357	0--4	0	4	3	3	0	10	2	2
Decanoic acid	Unpleasant flavor	1383	0	0	0	0	0	0	0	0	0
cis-Jasmone	Floral	1395	7--10	10	7	9	7	9	42	8.4	8
β-Cedrene	Woody	1408	4--8	8	6	6	4	7	31	6.2	6
β-Caryophyllene	Woody	1418	2--4	4	4	2	2	3	15	3	3
α-Ionone	Woody	1429	4--6	6	5	4	6	6	27	5.4	5
Geranyl acetone	Floral	1455	7--10	10	10	7	9	7	43	8.6	9
β-Ionone	Woody	1483	10--10	10	10	10	10	10	50	10	10
α-Farnesene	Fruity	1507	2--6	5	2	4	2	6	19	3.8	4
Dihydroactinidiolide	Unpleasant flavor	1534	10--10	10	10	10	10	10	50	10	10
Nerolidol	Floral, rose	1569	4--8	6	8	6	4	7	31	6.2	6
cis-3-Hexenylbenzoate	Green	1573	3--7	5	7	6	7	3	28	5.6	6
Cedrol	Woody	1606	7--10	9	7	10	7	8	41	8.2	8
α-Hexyl-cinnamaldehyde	Floral	1745	0	0	0	0	0	0	0	0	0
Phytol	Floral	2114	2--5	3	3	2	4	5	17	3.4	3

## Sheet: Pu-erh green tea
Compounds	Description	RI	Range	Pu-erh1	Pu-erh2	Pu-erh3	Pu-erh4	Pu-erh5	Sum	Average	Rounded data
Hexanal	Green	800	4--8	4	5	6	5	8	28	5.6	6
(Z)-3-Hexen-1-ol	Green	856	0	0	0	0	0	0	0	0	0
Benzaldehyde	Almond	963	0--3	3	2	2	0	3	10	2	2
1-Octen-3-ol	Mushroom	974	0--4	4	3	2	0	4	13	2.6	3
6-Methyl-5-hepten-2-one	Fruity, orange	981	0--4	3	0	4	4	0	11	2.2	2
β-Pinene	Woody	986	0--3	2	3	0	3	0	8	1.6	2
2-Pentyl-furan	Fruity	991	3--6	5	4	4	6	3	22	4.4	4
α-Phellandrene	Fruity	1002	0	0	0	0	0	0	0	0	0
α-Terpinene	Fruity	1019	0	0	0	0	0	0	0	0	0
D-Limonene	Fruity, lemon-like	1030	0--3	3	2	3	0	3	11	2.2	2
Benzyl alcohol	Fruity	1039	2--4	3	4	4	2	4	17	3.4	3
Benzeneacetaldehyde	Fruity	1046	0--2	0	2	2	0	0	4	0.8	1
α-Ocimene	Green	1051	3--5	4	4	5	3	5	21	4.2	4
Acetophenone	Fruity	1062	0	0	0	0	0	0	0	0	0
(E)-2-Octen-1-ol	Fatty	1068	0--3	2	0	0	3	3	8	1.6	2
Linalool oxide I	Floral	1071	4--7	7	6	4	4	7	28	5.6	6
Linalool oxide II	Floral	1084	4--8	7	5	8	7	4	31	6.2	6
β-Linalool	Floral	1098	10--10	10	10	10	10	10	50	10	10
Hotrienol	Musty	1109	0--4	4	0	2	2	0	8	1.6	2
Phenylethyl alcohol	Floral	1115	0	0	0	0	0	0	0	0	0
Linalool oxide III	Floral	1170	0--4	3	3	4	0	4	14	2.8	3
Linalool oxide IV	Floral	1174	0--3	3	2	3	3	0	11	2.2	2
4-Terpineol	Fruity, sweet	1179	0	0	0	0	0	0	0	0	0
Naphthalene	Woody, camphor-like	1183	0--2	0	0	0	2	2	4	0.8	1
2-(4-Methylphenyl)-2-propanol	Fruity, sweet	1189	0	0	0	0	0	0	0	0	0
α-Terpineol	Floral, sweet	1193	3--7	5	4	3	5	7	24	4.8	5
Methyl salicylate	Green, wintergreen-like	1198	4--6	6	4	5	6	4	25	5	5
Safranal	Woody	1202	0--3	3	0	0	2	3	8	1.6	2
Decanal	Floral, sweet	1207	0--2	0	2	0	0	2	4	0.8	1
β-Cyclocitral	Fruity	1217	3--7	7	6	4	3	6	26	5.2	5
Nerol	Floral, rose	1225	2--6	6	4	5	2	6	23	4.6	5
cis-3-Hexenyl isovalerate	Fruity, apple-like	1239	0	0	0	0	0	0	0	0	0
Carvone	Mint	1245	0	0	0	0	0	0	0	0	0
Geraniol	Floral, rose	1260	8--10	10	8	9	10	8	45	9	9
Nonanoic acid	Fatty, Unpleasant flavor	1289	0--4	3	0	4	0	3	10	2	2
2-Methyl-naphthalene	Herbal-like	1303	2--4	2	2	3	4	3	14	2.8	3
Indole	Unpleasant flavor	1309	0	0	0	0	0	0	0	0	0
1-Methyl-naphthalene	Unpleasant flavor	1312	2--4	4	3	4	2	4	17	3.4	3
Geranic acid	Floral, sweet	1357	2--5	4	3	5	4	2	18	3.6	4
Decanoic acid	Unpleasant flavor	1383	0--6	0	3	4	4	6	17	3.4	3
cis-Jasmone	Floral	1395	3--6	4	6	5	4	3	22	4.4	4
β-Cedrene	Woody	1408	0	0	0	0	0	0	0	0	0
β-Caryophyllene	Woody	1418	0--4	3	2	4	4	0	13	2.6	3
α-Ionone	Woody	1429	4--7	7	5	6	4	7	29	5.8	6
Geranyl acetone	Floral	1455	5--8	7	8	5	6	6	32	6.4	6
β-Ionone	Woody	1483	10--10	10	10	10	10	10	50	10	10
α-Farnesene	Fruity	1507	3--5	4	3	5	4	3	19	3.8	4
Dihydroactinidiolide	Unpleasant flavor	1534	10--10	10	10	10	10	10	50	10	10
Nerolidol	Floral, rose	1569	2--5	5	3	3	2	2	15	3	3
cis-3-Hexenylbenzoate	Green	1573	3--6	6	5	5	3	6	25	5	5
Cedrol	Woody	1606	2--5	5	3	4	2	4	18	3.6	4
α-Hexyl-cinnamaldehyde	Floral	1745	0--5	0	5	2	3	0	10	2	2
Phytol	Floral	2114	4--7	4	7	5	6	4	26	5.2	5
